# Supplementary material
Source: MDPI journal article supplement (https://www.mdpi.com/2073-4344/11/9/1077)
Supplement: s1 [file s1]

*To: Catalysts*

## **Supporting Information**

### **Phosphate enrichment of niobium based catalytic surfaces in relation to reactions of carbohydrate biomass conversion: the case studies of inulin hydrolysis and fructose dehydration**

Mariana N. Catrinck, Sebastiano Campisi, Paolo Carniti, Reinaldo F. Teófilo, Filippo Bossola, and Antonella Gervasini\*

## Figures and Tables

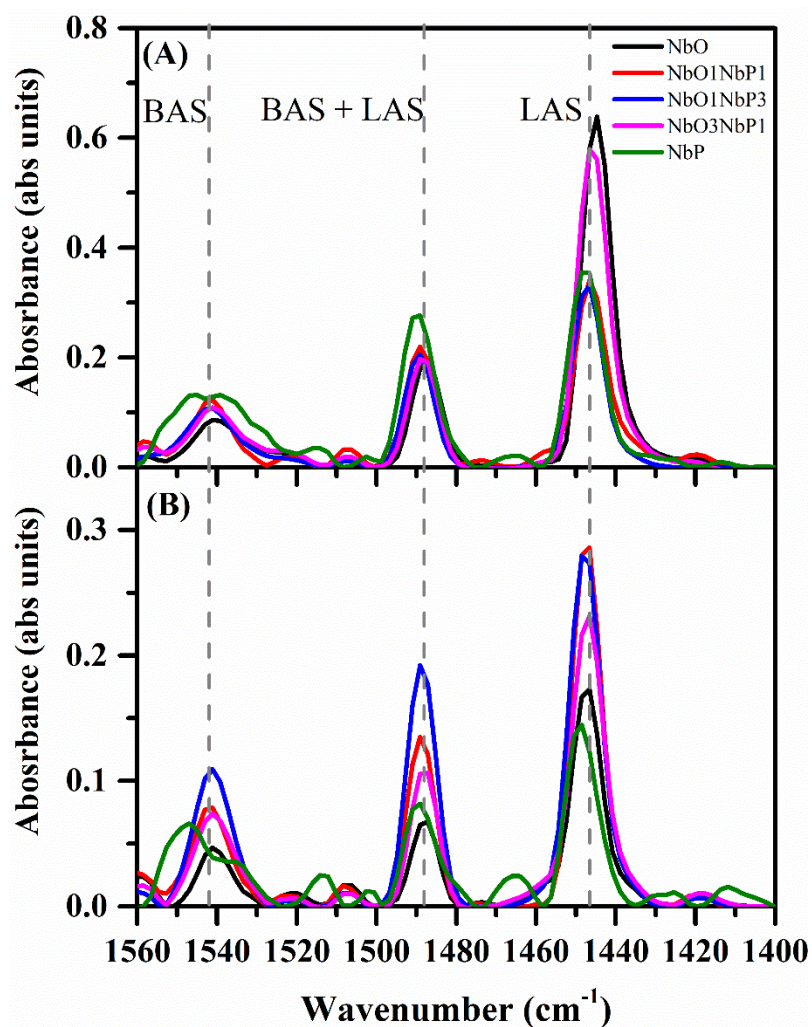

**Figure S1** FT-IR spectra of catalyst samples with pyridine vapor (A) and pyridine aqueous (B) after pyridine desorption at  $150^{\circ}\text{C}$ . The baselines of all spectra have been corrected.

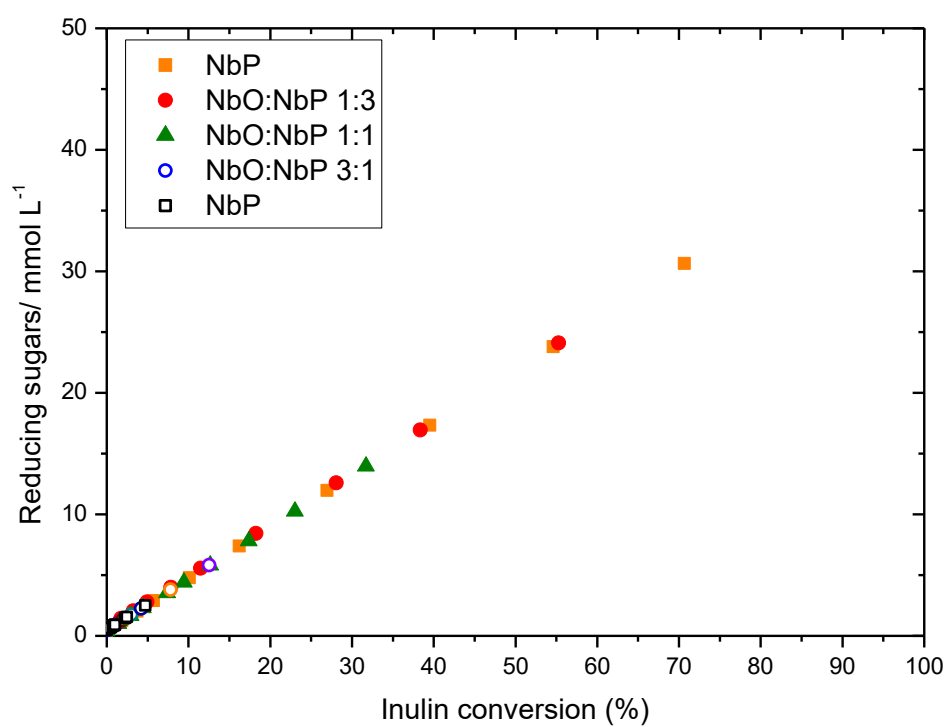

**Figure S2** Cumulative trend of the reducing sugar concentrations against inulin conversion, taken as an index of reaction progress.

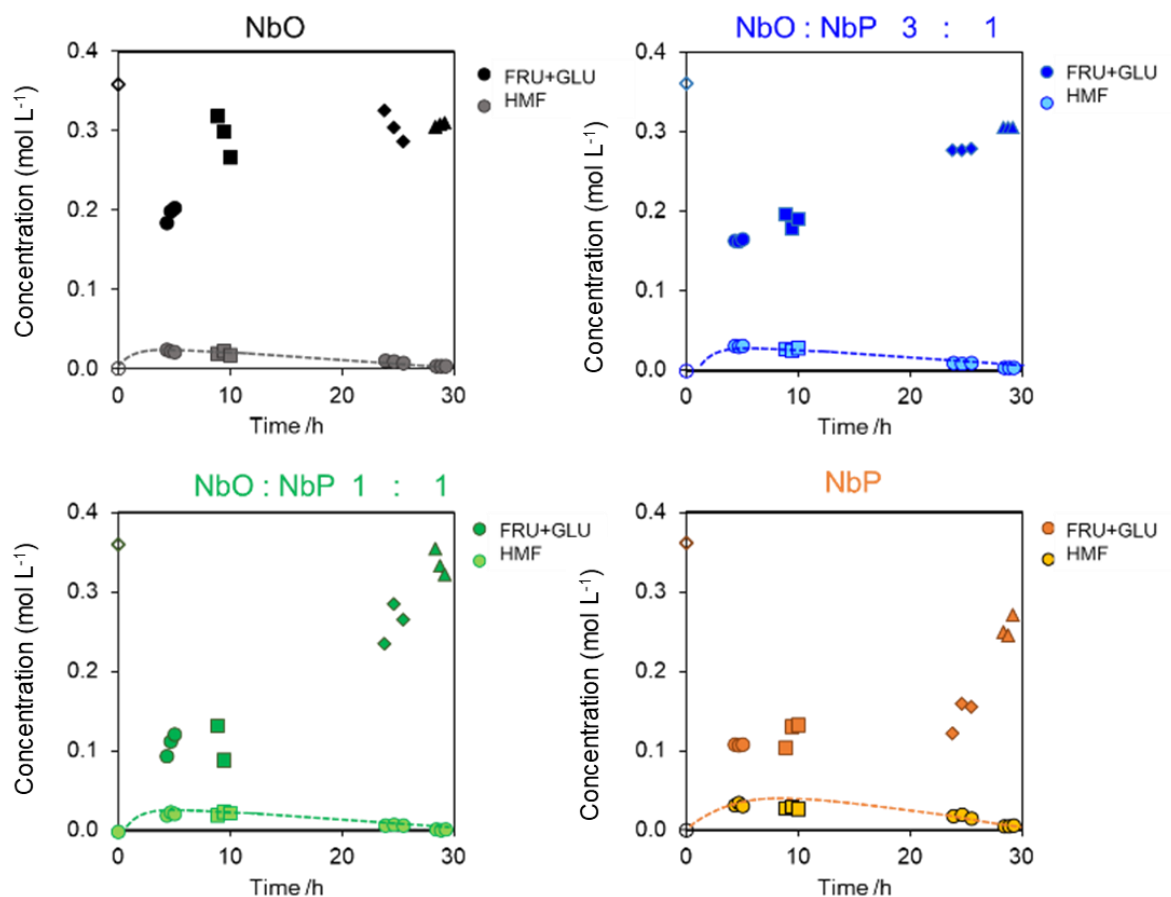

**Figure S3** Concentration profiles obtained from the continuous-flow reaction of glucose/fructose dehydration collected at 120°C: concentration of reagents (GLU+FRU) and formed HMF as a function of reaction time at different contact times: ● = 6 min·g<sup>-1</sup>·mL<sup>-1</sup>; ■ = 10 min·g<sup>-1</sup>·mL<sup>-1</sup>; ◇ = 15 min·g<sup>-1</sup>·mL<sup>-1</sup>; ▲ = 7.5 min·g<sup>-1</sup>·mL<sup>-1</sup>.

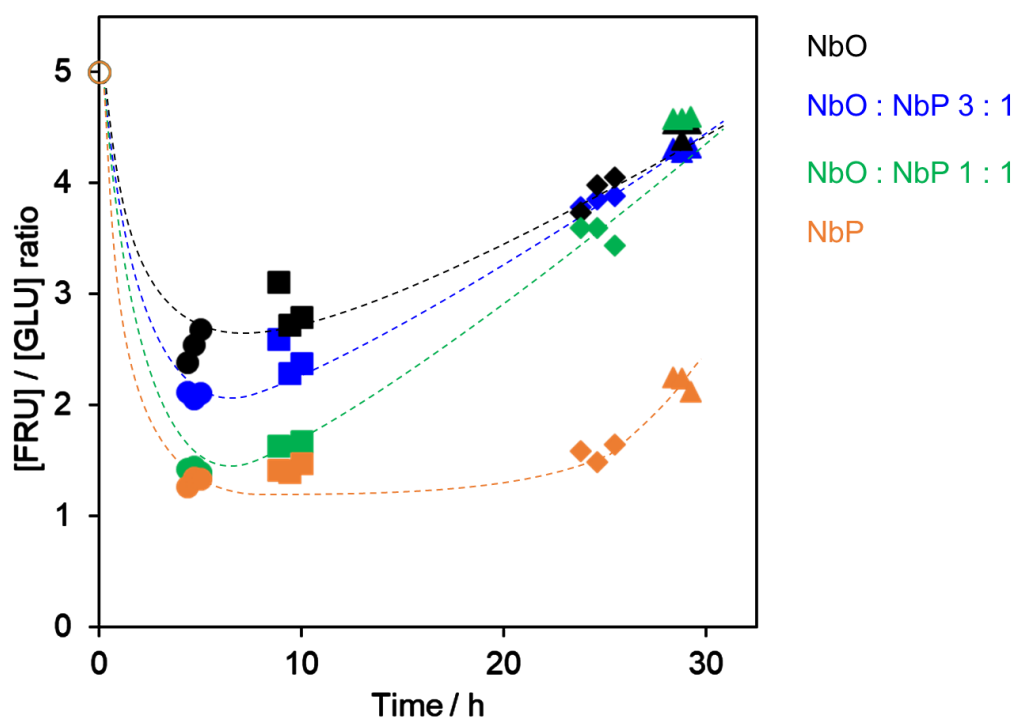

**Figure S4** Plot of fructose to glucose ratio as a function of reaction time in the continuous-flow reaction of glucose/fructose dehydration at 120°C at different contact times: ● = 6 min g<sup>-1</sup> mL<sup>-1</sup>; ■ = 10 min g<sup>-1</sup> mL<sup>-1</sup>; ◇ = 15 min g<sup>-1</sup> mL<sup>-1</sup>; ▲ = 7.5 min g<sup>-1</sup> mL<sup>-1</sup>.

**Table S1** EDX and XPS compositions of Nb-based samples

|                          | EDX composition (at.%) |             |             |                   |             |             | XPS surface composition (at.%) |     |      |      |
|--------------------------|------------------------|-------------|-------------|-------------------|-------------|-------------|--------------------------------|-----|------|------|
|                          | Areal analysis         |             |             | Punctual analysis |             |             |                                |     |      |      |
|                          | Nb                     | P           | O           | Nb                | P           | O           | Nb                             | P   | O    | C    |
| NbO                      | 26.6±0.6               | --          | 73.4±0.8    | 27.4±0.5          | --          | 72.6±0.8    |                                |     |      |      |
|                          | (67.8 wt.%)            | (-- wt.%)   | (32.2 wt.%) | (68.6 wt.%)       | (.. wt.%)   | (31.3 wt.%) |                                |     |      |      |
| NbO:NbP 3:1              | 21.9±0.5               | 4.1±0.1     | 74.0±0.77   | 20.7±0.8          | 5.6±0.1     | 73.8±0.8    | 18.8                           | 4.3 | 58.6 | 18.3 |
|                          | (60.8 wt.%)            | (3.8 wt.%)  | (35.4 wt.%) | (58.7 wt.%)       | (5.3 wt.%)  | (36.1 wt.%) |                                |     |      |      |
| NbO:NbP 1:1 <sup>a</sup> | 18.6±0.5               | 7.0±0.1     | 74.0±0.8    | 15.9±0.5          | 8.9±0.1     | 74.6±0.8    | 15.0                           | 6.6 | 50.0 | 28.4 |
|                          | (54.9 wt.%)            | (6.9 wt.%)  | (37.7 wt.%) | (49.8 wt.%)       | (9.2 wt.%)  | (40.1 wt.%) |                                |     |      |      |
| NbO:NbP 1:3 <sup>a</sup> | 16.2 ±0.5              | 9.4±0.1     | 73.8±0.8    | 14.8±0.5          | 10.2±0.1    | 74.4±0.8    | 14.5                           | 9.2 | 58.6 | 17.6 |
|                          | (50.1 wt.%)            | (9.7 wt.%)  | (39.4 wt.%) | (47.2 wt.%)       | (10.9 wt.%) | (41.0 wt.%) |                                |     |      |      |
| NbP <sup>a</sup>         | 14.1±0.3               | 10.8±0.1    | 74.4±0.6    | 14.5±0.5          | 11.0±0.2    | 73.8±0.8    | 19.2                           | 9.3 | 52.4 | 19.0 |
|                          | (45.7 wt.%)            | (11.7 wt.%) | (41.6 wt.%) | (46.5 wt.%)       | (11.8 wt.%) | (40.8 wt.%) |                                |     |      |      |

<sup>a</sup> Potassium (K) was detected as impurity (< 1 wt.%)

**Table S2** Nature and surface density of the acid sites in NbO and NbP solids and in physical mixtures, determined by FT-IR with pyridine (PY) adsorption in vapor phase with/without water and by solid-liquid phase titrations with phenyl-ethylamine PEA.

| Catalyst     | Nature of the acid sites         |                                 | Acid site density <sup>c</sup>             |                         |
|--------------|----------------------------------|---------------------------------|--------------------------------------------|-------------------------|
|              | Py <sub>(vap)</sub> <sup>a</sup> | Py <sub>(aq)</sub> <sup>b</sup> | Intrinsic acidity                          | Effective acidity       |
|              | LAS/BAS ratio                    |                                 | Total acid sites (μequiv m <sup>-2</sup> ) |                         |
| NbO          | 3.63                             | 2.86                            | 3.23 (73%) <sup>d</sup>                    | 2.16 (60%) <sup>d</sup> |
| NbO:NbP(3:1) | 2.67                             | 2.05                            | 3.70 (66%)                                 | 2.46 (55%)              |
| NbO:NbP(1:1) | 1.85                             | 2.18                            | 3.62 (66%)                                 | 2.62 (61%)              |
| NbO:NbP(1:3) | 1.48                             | 1.69                            | 4.07 (70%)                                 | 2.99 (59%)              |
| NbP          | 0.87                             | 0.91                            | 3.32 (72%)                                 | 3.31 (62%)              |

<sup>a</sup> Pyridine contacted in vapor phase, quantification after desorption at 150°C;

<sup>b</sup> Pyridine contacted in aqueous solution, quantification after desorption at 150°C;

<sup>c</sup> Adsorption temperature, 30°C; solvent, cyclohexane for intrinsic acidity and water/isopropanol mixture for effective acidity measurements;

<sup>d</sup> Percent of strong acid sites.
