# Supplementary material
Source: MDPI journal article supplement (https://www.mdpi.com/2073-4344/11/9/1077)
Supplement: s1 [file s1]

Archive with 1 entries (1 files):
- catalysts-1340309-supplementary.pdf
